# Supplementary material for: Barriers to Adolescents’ Adherence to Medical Advice after Metabolic Bariatric Surgery: A Statistical Analysis
Source: MDPI journal article supplement (doi:10.3390/jcm13061762), 2024-03-19
Supplement: s1 [file s1]

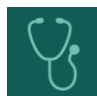

## Supplementary Table S1 – Parental report

### Intake

**Table S1a.** Percentage of lifestyle indices at intake as a function of adherence groups.

|                           |           | Adherence |             |       | $\chi^2$ | $\varphi$ |
|---------------------------|-----------|-----------|-------------|-------|----------|-----------|
|                           |           | Low       | Delayed low | High  |          |           |
| Family daily routine      | No        | 46.25     | 40.83       | 48.89 | 3.32     | 0.18      |
|                           | Yes       | 28.75     | 25.00       | 32.59 |          |           |
|                           | Partially | 25.00     | 34.17       | 18.52 |          |           |
| Family weekend routine    | No        | 20.00     | 24.17       | 32.96 | 4.23     | 0.21      |
|                           | Yes       | 36.25     | 57.14       | 44.81 |          |           |
|                           | Partially | 43.75     | 21.67       | 21.85 |          |           |
| Family meals              | No        | 25.00     | 11.67       | 25.19 | 2.12     | 0.20      |
|                           | Yes       | 75.00     | 88.33       | 74.81 |          |           |
| Family activities weekend | No        | 28.75     | 30.00       | 33.33 | 1.49     | 0.16      |
|                           | Yes       | 71.25     | 70.00       | 66.67 |          |           |

Note.  $\varphi$  = effect size.

**Table S1b.** Means, standard deviations, statistics, and effect sizes for the differences in parents' perception of their children's condition and their own condition.

|                                             | Low      |           | Delayed low |           | High     |           | $F_{(2,44)}$ | $\eta^2$ |
|---------------------------------------------|----------|-----------|-------------|-----------|----------|-----------|--------------|----------|
|                                             | <i>M</i> | <i>SD</i> | <i>M</i>    | <i>SD</i> | <i>M</i> | <i>SD</i> |              |          |
| Child's quality of relationship with mother | 4.40     | 0.59      | 4.61        | 0.39      | 4.60     | 0.33      | 0.43         | 0.04     |
| Child's quality of relationship with father | 3.31     | 0.82      | 3.44        | 1.34      | 3.35     | 1.09      | 0.04         | 0.00     |
| Child's depression                          | 10.18    | 1.13      | 10.21       | 1.66      | 9.09     | 2.50      | 1.80         | 0.06     |
| Child's hypomania                           | 11.08    | 0.58      | 11.46       | 0.67      | 10.64    | 2.10      | 2.00         | 0.05     |
| Child's obsession                           | 10.69    | 0.82      | 10.58       | 1.48      | 10.06    | 2.40      | 0.67         | 0.02     |
| Child's anxiety                             | 10.90    | 0.68      | 10.78       | 1.45      | 10.73    | 1.72      | 0.09         | 0.00     |
| Child's relationship with family            | 10.03    | 2.49      | 11.47       | 0.66      | 10.81    | 1.73      | 2.40         | 0.07     |
| Child's independence from family            | 9.05     | 2.25      | 8.91        | 2.70      | 9.89     | 2.69      | 0.70         | 0.03     |
| Child's interpersonal relationships         | 8.69     | 2.20      | 9.15        | 2.81      | 9.17     | 2.33      | 0.15         | 0.01     |
| Child's social activities                   | 5.82     | 2.54      | 5.49        | 4.14      | 4.67     | 3.61      | 0.55         | 0.02     |
| Child's social functioning (e5)             | 10.08    | 1.08      | 9.58        | 3.34      | 10.59    | 1.30      | 0.96         | 0.05     |
| Child's physical functioning                | 1.86     | 0.35      | 1.72        | 0.70      | 1.87     | 0.71      | 0.21         | 0.01     |
| Child's emotional functioning               | 1.15     | 0.36      | 1.24        | 0.46      | 1.50     | 0.63      | 2.01         | 0.07     |
| Child's social functioning (SAS)            | 1.08     | 0.56      | 1.45        | 0.74      | 1.33     | 0.64      | 0.87         | 0.03     |
| Child's academic functioning                | 1.34     | 0.31      | 1.48        | 0.68      | 1.42     | 0.61      | 0.25         | 0.01     |
| Child's depressive symptoms                 | 3.57     | 0.22      | 2.73        | 1.22      | 3.64     | 2.11      | 2.63         | 0.05     |
| Child's motivation for treatment            | 3.43     | 1.11      | 3.58        | 1.30      | 3.71     | 0.91      | 0.21         | 0.01     |
| Parents' employment adjustment              | 1.52     | 0.10      | 1.42        | 0.09      | 1.54     | 0.16      | 5.72*        | 0.20     |
| Parents' social life adjustment             | 2.10     | 0.17      | 1.81        | 0.49      | 1.91     | 0.31      | 5.40*        | 0.11     |
| Parents' extended family adjustment         | 1.48     | 0.13      | 1.56        | 0.27      | 1.59     | 0.32      | 1.16         | 0.02     |

|                                                   |      |      |      |      |      |      |      |      |
|---------------------------------------------------|------|------|------|------|------|------|------|------|
| Parents' major relationships adjustment           | 1.97 | 0.09 | 1.98 | 0.35 | 1.96 | 0.81 | 0.00 | 0.00 |
| Parents' parenting adjustment                     | 1.54 | 0.20 | 1.45 | 0.37 | 1.44 | 0.30 | 0.61 | 0.02 |
| Parents' familial adjustment                      | 1.91 | 0.24 | 2.13 | 0.42 | 1.92 | 0.35 | 1.31 | 0.07 |
| Parents' mood                                     | 3.27 | 1.34 | 3.63 | 1.25 | 4.17 | 3.45 | 0.60 | 0.02 |
| Parents' family adaptability and cohesion         | 2.57 | 0.51 | 2.85 | 0.16 | 2.74 | 0.37 | 1.60 | 0.06 |
| Parents' self-efficacy and parental effectiveness | 7.92 | 0.54 | 7.93 | 0.55 | 7.67 | 0.67 | 0.98 | 0.04 |

Note. \*  $p < .05$ .

### Supplementary Table S2 – Children's report

#### Intake

**Table 2a.** Percentage of lifestyle indices at intake as a function of adherence groups.

|                           |           | Adherence |             |      | $\chi^2$ | $\varphi$ |
|---------------------------|-----------|-----------|-------------|------|----------|-----------|
|                           |           | Low       | Delayed low | High |          |           |
| Family daily routine      | No        | 12.5      | 41.7        | 37.0 | 3.10     | 0.18      |
|                           | Yes       | 75.0      | 58.3        | 55.6 |          |           |
|                           | Partially | 12.5      | 0.0         | 7.4  |          |           |
| Family weekend routine    | No        | 12.5      | 8.3         | 25.9 | 2.96     | 0.20      |
|                           | Yes       | 87.5      | 75.0        | 66.7 |          |           |
|                           | Partially | 0.0       | 16.7        | 7.4  |          |           |
| Family meals              | No        | 0.0       | 0.0         | 7.4  | 0.97     | 0.18      |
|                           | Yes       | 100.0     | 100.0       | 92.6 |          |           |
| Family activities weekend | No        | 62.5      | 16.7        | 25.9 | 4.73*    | 0.34      |
|                           | Yes       | 37.5      | 83.3        | 74.1 |          |           |

Note.  $\varphi$  = effect size. \*  $p < .05$ .

**Table 2b.** Means, standard deviations, statistics, and effect sizes for the differences in children's condition in the intake for bariatric surgery.

|                                             | Low   |      | Delayed low |      | High  |      | $F_{(2,44)}$ | $\eta^2$ |
|---------------------------------------------|-------|------|-------------|------|-------|------|--------------|----------|
|                                             | $M$   | $SD$ | $M$         | $SD$ | $M$   | $SD$ |              |          |
| Child's quality of relationship with mother | 4.21  | 0.52 | 4.65        | 0.34 | 4.60  | 0.33 | 4.07*        | 0.16     |
| Child's quality of relationship with father | 3.65  | 0.31 | 3.92        | 1.07 | 3.71  | 1.01 | 0.33         | 0.01     |
| Child's depression                          | 8.30  | 1.74 | 9.58        | 2.30 | 8.92  | 1.98 | 0.97         | 0.04     |
| Child's hypomania                           | 11.43 | 0.36 | 11.60       | 0.43 | 11.14 | 1.20 | 1.52         | 0.04     |
| Child's obsession                           | 10.63 | 0.86 | 10.76       | 1.25 | 9.80  | 2.38 | 1.49         | 0.05     |
| Child's anxiety                             | 9.81  | 1.09 | 10.58       | 1.39 | 9.56  | 2.35 | 1.60         | 0.05     |
| Child's relationship with family            | 10.46 | 1.13 | 11.26       | 0.78 | 10.59 | 2.10 | 1.99         | 0.03     |
| Child's independence from family            | 9.90  | 1.30 | 9.22        | 2.21 | 9.07  | 2.53 | 0.84         | 0.02     |
| Child's interpersonal relationships         | 8.95  | 2.23 | 9.67        | 2.29 | 9.24  | 3.02 | 0.25         | 0.01     |
| Child's social activities                   | 5.39  | 2.31 | 6.95        | 4.32 | 5.57  | 3.42 | 0.57         | 0.03     |
| Child's social functioning (e5)             | 9.05  | 2.24 | 9.12        | 3.62 | 9.86  | 1.42 | 0.63         | 0.03     |

|                                          |       |       |       |      |       |      |       |      |
|------------------------------------------|-------|-------|-------|------|-------|------|-------|------|
| Child's physical functioning             | 1.89  | 0.44  | 1.50  | 0.76 | 1.81  | 0.57 | 1.06  | 0.06 |
| Child's emotional functioning            | 1.21  | 0.59  | 0.94  | 0.70 | 1.20  | 0.75 | 0.61  | 0.03 |
| Child's social functioning (SAS)         | 1.09  | 0.88  | 1.16  | 0.70 | 1.05  | 0.57 | 0.11  | 0.01 |
| Child's academic functioning             | 1.38  | 0.77  | 1.49  | 1.00 | 1.50  | 0.63 | 0.08  | 0.00 |
| Child's depressive symptoms              | 13.42 | 7.14  | 9.78  | 5.38 | 11.11 | 4.40 | 0.74  | 0.05 |
| Child's attachment to mother             | 2.16  | 0.89  | 2.44  | 0.19 | 2.39  | 0.53 | 0.43  | 0.03 |
| Child's attachment to mother             | 2.41  | 0.16  | 2.52  | 0.28 | 2.42  | 0.20 | 0.71  | 0.04 |
| Child's mood                             | 13.09 | 11.06 | 8.17  | 4.65 | 14.25 | 9.33 | 3.71* | 0.09 |
| Child's harassment                       | 7.30  | 2.60  | 11.67 | 8.70 | 8.05  | 8.73 | 1.31  | 0.04 |
| Child's cyberbullying                    | 1.45  | 1.56  | 1.14  | 1.13 | 1.36  | 2.01 | 0.15  | 0.00 |
| Child's bullying                         | 10.79 | 0.27  | 11.43 | 1.06 | 10.60 | 1.70 | 2.18  | 0.06 |
| Child's help seeking because of bullying | 36.81 | 4.59  | 34.48 | 5.42 | 34.37 | 8.27 | 0.71  | 0.02 |

Note. \*  $p < .05$ .

## Before Surgery

**Table 2c.** Percentage of lifestyle indices at intake as a function of adherence groups.

|                           |           | Adherence |             |      | $\chi^2$ | $\varphi$ |
|---------------------------|-----------|-----------|-------------|------|----------|-----------|
|                           |           | Low       | Delayed low | High |          |           |
| Family daily routine      | No        | 12.5      | 25.0        | 29.8 | 3.18     | 0.21      |
|                           | Yes       | 87.5      | 75.0        | 66.0 |          |           |
|                           | Partially | 0.0       | 0.0         | 4.3  |          |           |
| Family weekend routine    | No        | 0.0       | 16.7        | 29.6 | 4.42     | 0.22      |
|                           | Yes       | 100.0     | 83.3        | 66.7 |          |           |
|                           | Partially | 0.0       | 0.0         | 3.7  |          |           |
| Family meals              | No        | 0.0       | 0.0         | 3.7  | 1.17     | 0.13      |
|                           | Yes       | 100.0     | 100.0       | 96.3 |          |           |
| Family activities weekend | No        | 37.5      | 16.7        | 18.5 | 1.60     | 0.18      |
|                           | Yes       | 62.5      | 83.3        | 81.5 |          |           |

Note.  $\varphi$  = effect size.

**Table 2d.** Means, standard deviations, statistics, and effect sizes for the differences in children's condition before bariatric surgery.

|                                             | Low   |      | Delayed low |      | High  |      | $F_{(2,44)}$ | $\eta^2$ |
|---------------------------------------------|-------|------|-------------|------|-------|------|--------------|----------|
|                                             | $M$   | $SD$ | $M$         | $SD$ | $M$   | $SD$ |              |          |
| Child's quality of relationship with mother | 4.75  | 0.16 | 4.76        | 0.15 | 4.71  | 0.30 | 0.20         | 0.01     |
| Child's quality of relationship with father | 3.84  | 0.73 | 3.37        | 0.88 | 3.45  | 0.91 | 0.95         | 0.03     |
| Child's depression                          | 8.81  | 3.89 | 10.84       | 0.71 | 10.77 | 1.24 | 3.69*        | 0.15     |
| Child's hypomania                           | 9.18  | 3.76 | 10.68       | 0.83 | 10.50 | 1.74 | 0.64         | 0.06     |
| Child's obsession                           | 9.57  | 2.35 | 10.45       | 0.96 | 9.91  | 1.42 | 1.15         | 0.04     |
| Child's anxiety                             | 9.21  | 2.27 | 9.62        | 1.19 | 9.49  | 2.09 | 0.12         | 0.00     |
| Child's relationship with family            | 11.59 | 0.27 | 11.64       | 0.23 | 11.61 | 0.76 | 0.10         | 0.00     |
| Child's independence from family            | 8.87  | 2.08 | 9.37        | 0.85 | 10.43 | 1.36 | 5.09*        | 0.19     |

|                                          |       |       |       |      |       |      |      |      |
|------------------------------------------|-------|-------|-------|------|-------|------|------|------|
| Child's interpersonal relationships      | 10.56 | 0.91  | 10.52 | 0.91 | 9.76  | 2.85 | 0.85 | 0.03 |
| Child's social activities                | 8.52  | 1.45  | 8.26  | 1.23 | 7.71  | 3.68 | 0.41 | 0.01 |
| Child's social functioning (e5)          | 10.37 | 1.12  | 10.83 | 0.74 | 10.55 | 2.30 | 0.57 | 0.01 |
| Child's physical functioning             | 1.42  | 0.33  | 1.19  | 0.33 | 1.31  | 0.52 | 1.18 | 0.03 |
| Child's emotional functioning            | 0.76  | 0.76  | 0.63  | 0.39 | 0.85  | 0.64 | 0.82 | 0.02 |
| Child's social functioning (SAS)         | 0.55  | 0.47  | 0.69  | 0.30 | 0.83  | 0.61 | 1.00 | 0.04 |
| Child's academic functioning             | 0.98  | 0.55  | 1.06  | 0.51 | 1.17  | 0.83 | 0.29 | 0.01 |
| Child's depressive symptoms              | 6.07  | 0.44  | 5.06  | 1.98 | 6.36  | 3.87 | 1.51 | 0.03 |
| Child's mood                             | 6.51  | 7.78  | 4.05  | 2.31 | 5.86  | 4.61 | 1.48 | 0.03 |
| Child's harassment                       | 6.62  | 2.24  | 6.44  | 2.15 | 8.46  | 8.01 | 0.73 | 0.02 |
| Child's cyberbullying                    | 3.07  | 1.27  | 2.43  | 1.49 | 3.89  | 4.84 | 1.20 | 0.03 |
| Child's bullying                         | 21.22 | 12.89 | 27.11 | 5.18 | 25.11 | 8.45 | 0.93 | 0.05 |
| Child's help seeking because of bullying | 8.91  | 0.38  | 9.09  | 0.13 | 9.13  | 0.79 | 0.83 | 0.02 |

Note. \*  $p < .05$ .
